# Supplementary material for: Relationship between Alcohol Intake and Chronic Pain with Depressive Symptoms: A Cross-Sectional Analysis of the Shika Study
Source: MDPI journal article supplement (doi:10.3390/ijerph19042024), 2022-02-11
Supplement: s1 [file s1]

**Table S1.** Differences between participants with and without depressive symptoms in females

|                                       | Without depressive symptoms<br>( <i>n</i> = 667) |               | With depressive symptoms<br>( <i>n</i> = 350) |               | <i>p</i> -Value <sup>a</sup> |
|---------------------------------------|--------------------------------------------------|---------------|-----------------------------------------------|---------------|------------------------------|
|                                       | Mean / <i>n</i>                                  | <i>SD</i> / % | Mean / <i>n</i>                               | <i>SD</i> / % |                              |
| Age, years                            | 68.80                                            | 8.46          | 71.39                                         | 10.78         | <b>&lt;0.001</b>             |
| Living alone, <i>n</i>                | 98                                               | 11.95         | 52                                            | 13.13         | 0.558                        |
| Education, years                      | 10.99                                            | 2.46          | 10.65                                         | 2.57          | <b>0.025</b>                 |
| Without exercise/hobbies, <i>n</i>    | 477                                              | 85.17         | 303                                           | 76.52         | <b>&lt;0.001</b>             |
| Smoking history, <i>n</i>             | 31                                               | 3.78          | 13                                            | 3.28          | 0.663                        |
| BMI, kg/m <sup>2</sup>                | 22.78                                            | 3.08          | 22.36                                         | 3.50          | <b>0.040</b>                 |
| Diabetes treatment, <i>n</i>          | 60                                               | 7.32          | 33                                            | 8.33          | 0.532                        |
| Hyperlipidemia treatment, <i>n</i>    | 168                                              | 20.49         | 50                                            | 12.63         | <b>&lt;0.001</b>             |
| Hypertension treatment, <i>n</i>      | 252                                              | 30.73         | 120                                           | 30.30         | 0.879                        |
| Alcohol (crude data), g               | 2.05                                             | 6.01          | 1.96                                          | 6.86          | 0.829                        |
| Alcohol (density method),<br>% energy | 0.52                                             | 1.51          | 0.49                                          | 1.63          | 0.794                        |
| No alcohol intake, <i>n</i>           | 603                                              | 73.54         | 305                                           | 77.02         | 0.191                        |
| CP                                    |                                                  |               |                                               |               |                              |
| Any, <i>n</i>                         | 66                                               | 8.05          | 65                                            | 16.41         | <b>&lt;0.001</b>             |
| Head, <i>n</i>                        | 1                                                | 0.12          | 3                                             | 0.76          | 0.104                        |
| Neck/shoulder/upper limb, <i>n</i>    | 25                                               | 3.05          | 21                                            | 5.30          | 0.053                        |
| Low back/knee, <i>n</i>               | 49                                               | 5.98          | 46                                            | 11.62         | <b>&lt;0.001</b>             |
| Foot, <i>n</i>                        | 12                                               | 1.46          | 11                                            | 2.78          | 0.115                        |

**Notes:** <sup>a</sup> *p*-values were calculated using the Student's *t*-test for continuous variables and the chi-squared test for categorical variables (*p*-values less than 0.05 are highlighted in bold).

**Abbreviations:** SD, standard deviation; BMI, body mass index; CP, chronic pain.

**Table S2.** Differences between chronic pain groups stratified in females

|                                    | Non-CP (any)<br>( <i>n</i> = 1085) |               | CP (any)<br>( <i>n</i> = 131) |               | <i>p</i> -Value <sup>a</sup> |
|------------------------------------|------------------------------------|---------------|-------------------------------|---------------|------------------------------|
|                                    | Mean / <i>n</i>                    | <i>SD</i> / % | Mean / <i>n</i>               | <i>SD</i> / % |                              |
| Age, years                         | 69.23                              | 9.13          | 73.08                         | 10.45         | <b>&lt;0.001</b>             |
| Living alone, <i>n</i>             | 128                                | 11.80         | 22                            | 16.79         | 0.100                        |
| Education, years                   | 10.96                              | 2.48          | 10.22                         | 2.60          | <b>0.002</b>                 |
| Without exercise/hobbies, <i>n</i> | 687                                | 63.32         | 93                            | 70.99         | 0.084                        |
| Smoking history, <i>n</i>          | 38                                 | 3.50          | 6                             | 4.58          | 0.533                        |
| BMI, kg/m <sup>2</sup>             | 22.63                              | 3.20          | 22.77                         | 3.42          | 0.650                        |
| Diabetes treatment, <i>n</i>       | 82                                 | 7.56          | 11                            | 8.40          | 0.733                        |
| Hyperlipidemia treatment, <i>n</i> | 204                                | 18.80         | 14                            | 10.69         | <b>0.022</b>                 |
| Hypertension treatment, <i>n</i>   | 335                                | 30.88         | 37                            | 28.24         | <b>0.537</b>                 |
| Depressive symptoms, <i>n</i>      | 331                                | 30.51         | 65                            | 49.62         | <b>&lt;0.001</b>             |
| Alcohol (crude data), g            | 2.09                               | 6.42          | 1.45                          | 5.16          | 0.199                        |
| Alcohol (density method), % energy | 0.53                               | 1.57          | 0.37                          | 1.30          | 0.197                        |
| No alcohol intake, <i>n</i>        | 801                                | 73.82         | 107                           | 81.68         | 0.051                        |
| CP                                 |                                    |               |                               |               |                              |
| Head, <i>n</i>                     | 0                                  | –             | 4                             | 3.05          | –                            |
| Neck/shoulder/upper limb, <i>n</i> | 0                                  | –             | 46                            | 35.11         | –                            |

|                         |   |   |    |       |   |
|-------------------------|---|---|----|-------|---|
| Low back/knee, <i>n</i> | 0 | – | 95 | 72.52 | – |
| Foot, <i>n</i>          | 0 | – | 23 | 17.56 | – |

**Notes:** <sup>a</sup> *p*-values were calculated using the Student's *t*-test for continuous variables and the chi-squared test for categorical variables (*p*-values less than 0.05 are highlighted in bold). **Abbreviations:** SD, standard deviation; BMI, body mass index; CP, chronic pain.

**Table S3.** Interactions between depressive symptoms and CP on alcohol intake (density method) in females

|                                   |     | Non-CP (any)<br>( <i>n</i> = 1085) |          | CP (any)<br>( <i>n</i> = 131) |          | DS    | CP    | DS × CP |
|-----------------------------------|-----|------------------------------------|----------|-------------------------------|----------|-------|-------|---------|
|                                   |     | Mean (95%CI)                       | <i>n</i> | Mean (95%CI)                  | <i>n</i> |       |       |         |
| Head pain                         | NDS | 0.50 (0.40, 0.61)                  | 819      | -0.21 (-3.19, 2.78)           | 1        | 0.979 | 0.391 | 0.958   |
|                                   | DS  | 0.53 (0.37, 0.68)                  | 393      | -0.27 (-2.00, 1.45)           | 3        |       |       |         |
| Neck/shoulder/<br>upper limb pain | NDS | 0.50 (0.40, 0.61)                  | 795      | 0.51 (-0.09, 1.10)            | 25       | 0.937 | 0.983 | 0.998   |
|                                   | DS  | 0.52 (0.36, 0.68)                  | 375      | 0.52 (-0.13, 1.18)            | 21       |       |       |         |
| Low back/knee pain                | NDS | 0.52 (0.41, 0.62)                  | 771      | 0.30 (-0.13, 0.73)            | 49       | 0.523 | 0.497 | 0.538   |
|                                   | DS  | 0.52 (0.36, 0.68)                  | 350      | 0.51 (0.06, 0.95)             | 46       |       |       |         |
| Foot pain                         | NDS | 0.50 (0.40, 0.61)                  | 808      | 0.57 (-0.30, 1.43)            | 12       | 0.603 | 0.688 | 0.544   |
|                                   | DS  | 0.53 (0.37, 0.68)                  | 385      | 0.21 (-0.69, 1.10)            | 11       |       |       |         |

**Notes:** <sup>a</sup> Analysis of covariance (*p*-values less than 0.05 are highlighted in bold). Adjusted for BMI, age, living alone, education, without exercise/hobbies, smoking history, BMI, diabetes treatment, hyperlipidemia treatment, and hypertension treatment.

**Abbreviations:** CP, chronic pain; NDS, no depressive symptoms; DS, depressive symptoms; CI, confidence interval; BMI, body mass index.

**Table S4** Relationship between alcohol intake and CP stratified by depressive symptoms in females

|                                                  |                          | Exp(B) | 95%CI Lower | 96%CI Upper | <i>p</i> -Value |
|--------------------------------------------------|--------------------------|--------|-------------|-------------|-----------------|
| With depressive symptoms<br>( <i>n</i> = 396)    | Alcohol (density method) | 1.017  | 0.861       | 12.010      | 0.842           |
| Without depressive symptoms<br>( <i>n</i> = 820) | Alcohol (density method) | 0.871  | 0.672       | 1.130       | 0.300           |

**Notes:** Significant estimates are in bold. Adjusted for BMI, age, living alone, education, without exercise/hobbies, smoking history, BMI, diabetes treatment, hyperlipidemia treatment, and hypertension treatment. **Abbreviations:** Exp (B), Exponentiation of the B coefficient; CI, confidence interval.
